# Supplementary material
Source: HighWire-hosted journal article supplement (https://bmjopen.bmj.com/content/9/4/e025517)
Supplement: inline-supplementary-material-1 [file inline-supplementary-material-1.pdf]

**Supplemental Table 1.** Characteristics of the overall sample in 1989 of eligible women from the Nurses' Health Study II (NHS II) and the sample who participated in the Diabetes & Women's Health (DWH) Study

| Characteristic in 1989                                                 | Eligible Source Population<br>(n=6,485) |                     | DWH Participants<br>(n=3,667) |                     |
|------------------------------------------------------------------------|-----------------------------------------|---------------------|-------------------------------|---------------------|
|                                                                        | n                                       | Mean (SD)<br>or (%) | n                             | Mean (SD)<br>or (%) |
| Age, years                                                             | 6461                                    | 33.9 (4.5)          | 3667                          | 34.0 (4.5)          |
| 25-29                                                                  | 1365                                    | (21.1)              | 739                           | (20.2)              |
| 30-34                                                                  | 2368                                    | (36.5)              | 1332                          | (36.3)              |
| 35-39                                                                  | 1948                                    | (30.0)              | 1152                          | (31.4)              |
| ≥ 40                                                                   | 780                                     | (12.0)              | 444                           | (12.1)              |
| Missing                                                                | 24                                      | (0.4)               |                               |                     |
| Race                                                                   |                                         |                     |                               |                     |
| White                                                                  | 5809                                    | (89.6)              | 3350                          | (91.4)              |
| Non-White                                                              | 676                                     | (10.4)              | 317                           | (8.6)               |
| Marital status                                                         |                                         |                     |                               |                     |
| Not married                                                            | 1005                                    | (15.5)              | 539                           | (14.7)              |
| Married                                                                | 5470                                    | (84.4)              | 3123                          | (85.2)              |
| Missing                                                                | 10                                      | (0.2)               | 5                             | (0.1)               |
| Parity                                                                 |                                         |                     |                               |                     |
| Nulliparous                                                            | 920                                     | (14.2)              | 510                           | (13.9)              |
| Multiparous                                                            | 5565                                    | (85.8)              | 3157                          | (86.1)              |
| Smoker                                                                 |                                         |                     |                               |                     |
| No                                                                     | 4290                                    | (66.2)              | 2539                          | (69.2)              |
| Current                                                                | 825                                     | (12.7)              | 390                           | (10.6)              |
| Past                                                                   | 1361                                    | (21.0)              | 733                           | (20.0)              |
| Missing                                                                | 9                                       | (0.1)               | 5                             | (0.1)               |
| Family history of type 2<br>diabetes (1 <sup>st</sup> degree relative) |                                         |                     |                               |                     |
| No                                                                     | 4677                                    | (72.1)              | 2667                          | (72.7)              |
| Yes                                                                    | 1808                                    | (27.9)              | 1000                          | (27.3)              |
| Body mass index, kg/m <sup>2</sup>                                     | 6418                                    | 25.6 (5.9)          | 3639                          | 25.1 (5.6)          |
| <18.5                                                                  | 164                                     | (2.5)               | 106                           | (2.9)               |
| 18.5-24.9                                                              | 3505                                    | (54.1)              | 2103                          | (57.4)              |
| 25.0-29.9                                                              | 1539                                    | (23.7)              | 841                           | (22.9)              |
| 30.0-34.9                                                              | 693                                     | (10.7)              | 338                           | (9.2)               |
| 35.0-39.9                                                              | 318                                     | (4.9)               | 160                           | (4.4)               |
| ≥ 40.0                                                                 | 199                                     | (3.1)               | 91                            | (2.5)               |
| Missing                                                                | 67                                      | (1.0)               | 28                            | (0.8)               |

Abbreviations: SD, standard deviation.

**Supplemental Table 2.** Characteristics of the overall sample of eligible women from Danish National Birth Cohort (DNBC) and the sample who participated in the Diabetes & Women's Health (DWH) Study

| Characteristic at DNBC index pregnancy           | Eligible Source Population (n=1274) |                  | DWH Participants (n=790) |                  |
|--------------------------------------------------|-------------------------------------|------------------|--------------------------|------------------|
|                                                  | n                                   | Mean (SD) or (%) | n                        | Mean (SD) or (%) |
| Age, years <sup>c</sup>                          | 1274                                | 31.3 (4.6)       | 790                      | 31.6 (4.5)       |
| < 25                                             | 77                                  | (6.0)            | 35                       | (4.4)            |
| 25-29                                            | 352                                 | (27.6)           | 219                      | (27.7)           |
| 30-34                                            | 526                                 | (41.3)           | 333                      | (42.2)           |
| 35-39                                            | 282                                 | (22.1)           | 175                      | (22.2)           |
| ≥ 40                                             | 37                                  | (2.9)            | 28                       | (3.5)            |
| Cohabitation status                              |                                     |                  |                          |                  |
| Not living with a partner                        | 31                                  | (2.4)            | 13                       | (1.7)            |
| Living with a partner                            | 1141                                | (89.6)           | 716                      | (90.6)           |
| Missing                                          | 102                                 | (8.0)            | 61                       | (7.7)            |
| Pre-pregnancy body mass index, kg/m <sup>2</sup> | 1184                                | 27.7 (5.9)       | 735                      | 27.5 (5.8)       |
| < 18.5                                           | 19                                  | (1.5)            | 10                       | (1.3)            |
| 18.5-24.9                                        | 440                                 | (34.5)           | 289                      | (36.6)           |
| 25.0-29.9                                        | 341                                 | (26.8)           | 212                      | (26.8)           |
| 30.0-34.9                                        | 245                                 | (19.2)           | 141                      | (17.9)           |
| 35.0-39.9                                        | 104                                 | (8.2)            | 63                       | (8.0)            |
| ≥ 40.0                                           | 35                                  | (2.8)            | 20                       | (2.5)            |
| Missing                                          | 90                                  | (7.1)            | 55                       | (7.0)            |
| Parity                                           |                                     |                  |                          |                  |
| Nulliparous                                      | 445                                 | (34.9)           | 293                      | (37.1)           |
| Multiparous                                      | 727                                 | (57.1)           | 436                      | (55.2)           |
| Unknown                                          | 102                                 | (8.0)            | 61                       | (7.7)            |
| Current Smoker                                   |                                     |                  |                          |                  |
| No                                               | 856                                 | (67.2)           | 553                      | (70.0)           |
| Yes                                              | 362                                 | (28.4)           | 209                      | (26.5)           |
| Missing                                          | 56                                  | (4.4)            | 28                       | (3.5)            |
| Socioeconomic status                             |                                     |                  |                          |                  |
| High level professional                          | 209                                 | (16.4)           | 148                      | (18.7)           |
| Medium level professional                        | 323                                 | (25.4)           | 219                      | (27.7)           |
| Skilled worker                                   | 363                                 | (28.5)           | 214                      | (27.1)           |
| Student                                          | 41                                  | (3.2)            | 22                       | (2.8)            |
| Unskilled worker                                 | 203                                 | (15.9)           | 113                      | (14.3)           |
| Unemployed                                       | 30                                  | (2.4)            | 10                       | (1.3)            |
| Missing                                          | 105                                 | (8.2)            | 64                       | (8.1)            |

Abbreviations: SD, standard deviation.

## Zhang C et al. Cohort Profile: Diabetes & Women's Health Study

**Appendix 1.** List of historical data relevant to the Diabetes & Women's Health (DWH) Study from the Nurses' Health Study II (NHS II) or Danish National Birth Cohort (DNBC).

| <b>Nurses' Health Study II<sup>a</sup></b>                                                                                                                                                                                                                                                                                                                                                                                                                                                                                                                                                                                                                                                                   |                                                                                                                                                                                                                                                                                                                                                                                                                                                                                                                                                                                                                                                                                                                        |
|--------------------------------------------------------------------------------------------------------------------------------------------------------------------------------------------------------------------------------------------------------------------------------------------------------------------------------------------------------------------------------------------------------------------------------------------------------------------------------------------------------------------------------------------------------------------------------------------------------------------------------------------------------------------------------------------------------------|------------------------------------------------------------------------------------------------------------------------------------------------------------------------------------------------------------------------------------------------------------------------------------------------------------------------------------------------------------------------------------------------------------------------------------------------------------------------------------------------------------------------------------------------------------------------------------------------------------------------------------------------------------------------------------------------------------------------|
| <p><b>Lifestyle</b></p> <ul style="list-style-type: none"> <li>• Food frequency questionnaire</li> <li>• Physical activity</li> <li>• Sleep</li> <li>• Smoking</li> <li>• Alcohol use</li> <li>• Shift work</li> <li>• Vitamins/supplements</li> </ul> <p><b>Anthropometrics</b></p> <ul style="list-style-type: none"> <li>• Height</li> <li>• Weight</li> <li>• Waist circumference</li> <li>• Hip circumference</li> <li>• Weight at 18</li> <li>• Body type</li> </ul> <p><b>Family History</b></p> <ul style="list-style-type: none"> <li>• Myocardial infarction</li> <li>• Breast cancer</li> <li>• Hypertension</li> <li>• Melanoma</li> <li>• Diabetes</li> <li>• Colon or rectal cancer</li> </ul> | <p><b>Health Conditions</b></p> <ul style="list-style-type: none"> <li>• Infertility</li> <li>• Contraception</li> <li>• Menopause</li> <li>• Hormone treatment</li> <li>• Heart problems</li> <li>• Cancer GI disorders</li> <li>• Diabetes</li> <li>• Other health conditions (specify)</li> <li>• Restless legs</li> <li>• Migraines</li> <li>• Medications</li> <li>• Cancer screening</li> </ul> <p><b>Participant Birth History</b></p> <ul style="list-style-type: none"> <li>• Birthweight</li> <li>• Breastfed</li> <li>• Gestational age</li> </ul> <p><b>Demographics</b></p> <ul style="list-style-type: none"> <li>• Marital status</li> <li>• Parity</li> <li>• Race/ethnicity</li> <li>• Age</li> </ul> |
| <b>Danish National Birth Cohort<sup>a</sup></b>                                                                                                                                                                                                                                                                                                                                                                                                                                                                                                                                                                                                                                                              |                                                                                                                                                                                                                                                                                                                                                                                                                                                                                                                                                                                                                                                                                                                        |
| <p><b>Lifestyle</b></p> <ul style="list-style-type: none"> <li>• Food frequency questionnaire</li> <li>• Sleep during pregnancy</li> <li>• Smoking during pregnancy</li> <li>• Alcohol use during pregnancy</li> <li>• Vitamins/supplements</li> <li>• Breastfeeding</li> </ul> <p><b>Health Conditions</b></p> <ul style="list-style-type: none"> <li>• Infertility</li> <li>• Contraception</li> <li>• Hypertension</li> <li>• Asthma</li> <li>• Allergies</li> <li>• Depression</li> <li>• Anemia</li> <li>• Medications</li> </ul>                                                                                                                                                                       | <p><b>Demographics</b></p> <ul style="list-style-type: none"> <li>• Marital status</li> <li>• Parity</li> <li>• Socioeconomic status</li> <li>• Age</li> <li>• Schooling</li> </ul> <p><b>Anthropometrics</b></p> <ul style="list-style-type: none"> <li>• Pre-pregnancy weight</li> <li>• Weight at enrollment</li> <li>• Postpartum weight</li> <li>• Height</li> </ul>                                                                                                                                                                                                                                                                                                                                              |

<sup>a</sup>Note this is not an exhaustive list of data that has been collected.

**Appendix 2.** Data collection summary for the Diabetes & Women's Health (DWH) Study by historical cohort.

| Variable                      | Cycle 1 (2012-2014)                                                                                                                                                                                                                                                                                                                                                                                                                                                                                                                                                                       | Cycle 2 (2014-2016)                                                                                                                                                                                                                                                                                                                                                                                                                                                                                                       |
|-------------------------------|-------------------------------------------------------------------------------------------------------------------------------------------------------------------------------------------------------------------------------------------------------------------------------------------------------------------------------------------------------------------------------------------------------------------------------------------------------------------------------------------------------------------------------------------------------------------------------------------|---------------------------------------------------------------------------------------------------------------------------------------------------------------------------------------------------------------------------------------------------------------------------------------------------------------------------------------------------------------------------------------------------------------------------------------------------------------------------------------------------------------------------|
| <b>Collected Biospecimens</b> | <b>NHS II and DNBC</b> <ul style="list-style-type: none"> <li>• Fasting blood                             <ul style="list-style-type: none"> <li>○ Serum and clot</li> <li>○ Plasma</li> <li>○ WBC/buffy coat and RBCs</li> <li>○ Whole blood</li> <li>○ PAXgene</li> </ul> </li> <li>• First morning urine</li> <li>• Toenails</li> </ul>                                                                                                                                                                                                                                                | <b>NHS II and DNBC</b> <ul style="list-style-type: none"> <li>• Fasting blood                             <ul style="list-style-type: none"> <li>○ Serum and clot</li> <li>○ Plasma</li> <li>○ WBC/buffy coat and RBCs</li> <li>○ Whole blood</li> </ul> </li> <li>• First morning urine</li> <li>• Saliva</li> </ul>                                                                                                                                                                                                     |
| <b>Pregnancy History</b>      | <b>NHS II and DNBC</b> <ul style="list-style-type: none"> <li>• Gestational age</li> <li>• Pre-pregnancy weight</li> <li>• Body type before pregnancy</li> <li>• Weight at delivery</li> <li>• Weight 12 months after delivery</li> <li>• GDM</li> <li>• High blood pressure</li> <li>• Preeclampsia</li> <li>• Anemia</li> <li>• GDM treatment</li> <li>• Multi-fetal pregnancy</li> <li>• Fetal sex</li> <li>• Birthweight</li> <li>• Breastfeeding</li> <li>• Infant feeding</li> </ul> <b>DNBC Only</b> <ul style="list-style-type: none"> <li>• Infertility and treatment</li> </ul> | <b>DNBC Only</b> <ul style="list-style-type: none"> <li>• Gestational age</li> <li>• Pre-pregnancy weight</li> <li>• Body type before pregnancy</li> <li>• Weight at delivery</li> <li>• Weight 12 months after delivery</li> <li>• GDM</li> <li>• High blood pressure</li> <li>• Preeclampsia</li> <li>• Anemia</li> <li>• GDM treatment</li> <li>• Multi-fetal pregnancy</li> <li>• Fetal sex</li> <li>• Birthweight</li> <li>• Breastfeeding</li> <li>• Infant feeding</li> <li>• Infertility and treatment</li> </ul> |
| <b>First GDM Pregnancy</b>    | <b>NHS II and DNBC</b> <ul style="list-style-type: none"> <li>• Prior diabetes while not pregnant</li> <li>• High blood pressure while not pregnant</li> <li>• Lip/chin hair</li> <li>• 1-hour GCT</li> <li>• OGTT</li> <li>• Postpartum DM testing</li> <li>• High blood pressure after pregnancy</li> <li>• Blood pressure treatment</li> <li>• Postpartum depression</li> <li>• Anemia</li> <li>• Blood donation</li> <li>• Family history of GDM</li> </ul>                                                                                                                           | <b>NHS II non-Cycle 1 participants only</b> <ul style="list-style-type: none"> <li>• Prior diabetes while not pregnant</li> <li>• High blood pressure while not pregnant</li> <li>• Smoking while pregnant</li> <li>• 1-hour GCT</li> <li>• OGTT</li> <li>• Postpartum DM testing</li> <li>• High blood pressure after pregnancy</li> <li>• Blood pressure treatment</li> <li>• Postpartum depression</li> </ul>                                                                                                          |
| <b>Lifestyle</b>              | <b>NHS II and DNBC</b> <ul style="list-style-type: none"> <li>• Physical activity</li> <li>• Sleep habits</li> </ul>                                                                                                                                                                                                                                                                                                                                                                                                                                                                      | <b>NHS II and DNBC</b> <ul style="list-style-type: none"> <li>• Physical activity</li> <li>• Sleep habits</li> </ul>                                                                                                                                                                                                                                                                                                                                                                                                      |

Zhang C et al. Cohort Profile: Diabetes & Women's Health Study

| Variable                                 | Cycle 1 (2012-2014)                                                                                                                                                                                                                                                                                                                                                                                                                                                | Cycle 2 (2014-2016)                                                                                                                                                                                                                                                                                                                                                                                                                                                                                                                                                                                                                                                                                                                                                                                                 |
|------------------------------------------|--------------------------------------------------------------------------------------------------------------------------------------------------------------------------------------------------------------------------------------------------------------------------------------------------------------------------------------------------------------------------------------------------------------------------------------------------------------------|---------------------------------------------------------------------------------------------------------------------------------------------------------------------------------------------------------------------------------------------------------------------------------------------------------------------------------------------------------------------------------------------------------------------------------------------------------------------------------------------------------------------------------------------------------------------------------------------------------------------------------------------------------------------------------------------------------------------------------------------------------------------------------------------------------------------|
|                                          | <ul style="list-style-type: none"> <li>• Smoking</li> </ul> <b>DNBC Only</b> <ul style="list-style-type: none"> <li>• Depression</li> <li>• Marital status</li> <li>• Food frequency questionnaire</li> </ul>                                                                                                                                                                                                                                                      | <ul style="list-style-type: none"> <li>• Smoking</li> </ul> <b>DNBC Only</b> <ul style="list-style-type: none"> <li>• Depression</li> <li>• Food frequency questionnaire</li> </ul>                                                                                                                                                                                                                                                                                                                                                                                                                                                                                                                                                                                                                                 |
| <b>Anthropometrics</b>                   | <b>NHS II and DNBC</b> <ul style="list-style-type: none"> <li>• Waist</li> <li>• Hip</li> </ul> <b>DNBC only</b> <ul style="list-style-type: none"> <li>• Weight</li> <li>• Height</li> <li>• DEXA</li> </ul>                                                                                                                                                                                                                                                      | <b>NHS II and DNBC</b> <ul style="list-style-type: none"> <li>• Waist</li> <li>• Hip</li> <li>• Weight</li> </ul> <b>DNBC only</b> <ul style="list-style-type: none"> <li>• Height</li> <li>• DEXA</li> </ul>                                                                                                                                                                                                                                                                                                                                                                                                                                                                                                                                                                                                       |
| <b>General Health</b>                    | <b>DNBC Only</b> <ul style="list-style-type: none"> <li>• Employment</li> <li>• Education</li> <li>• Contraception</li> <li>• Menopause</li> <li>• Hormone treatment</li> <li>• Food allergies</li> <li>• Heart problems</li> <li>• Cancer</li> <li>• GI disorders</li> <li>• Diabetes</li> <li>• Other health conditions (list)</li> <li>• Restless legs</li> <li>• Migraines</li> <li>• Medications</li> <li>• Cancer screening</li> <li>• Depression</li> </ul> | <b>NHS II and DNBC</b> <ul style="list-style-type: none"> <li>• Bladder or kidney infection</li> <li>• Chronic kidney disease</li> <li>• Bladder or urologic surgery</li> <li>• Current blood pressure</li> <li>• Current resting heart rate</li> <li>• Anemia (long questionnaire only)</li> <li>• Eye health (long questionnaire only)</li> <li>• Current blood pressure</li> <li>• Current resting heart rate</li> </ul> <b>DNBC Only</b> <ul style="list-style-type: none"> <li>• OGTT</li> <li>• Contraception</li> <li>• Menopause</li> <li>• Hormone treatment</li> <li>• Heart problems</li> <li>• Cancer</li> <li>• GI disorders</li> <li>• Diabetes</li> <li>• Other health conditions (list)</li> <li>• Restless legs</li> <li>• Migraines</li> <li>• Bariatric surgery</li> <li>• Depression</li> </ul> |
| <b>Participants' Health in Childhood</b> | <b>DNBC Only</b> <ul style="list-style-type: none"> <li>• Birthweight</li> <li>• Breastfed</li> <li>• Gestational age</li> <li>• Weight at 18</li> <li>• Body size</li> </ul>                                                                                                                                                                                                                                                                                      |                                                                                                                                                                                                                                                                                                                                                                                                                                                                                                                                                                                                                                                                                                                                                                                                                     |
| <b>Family Medical History</b>            | <b>NHS II and DNBC</b> <ul style="list-style-type: none"> <li>• GDM</li> </ul> <b>DNBC Only</b> <ul style="list-style-type: none"> <li>• Diabetes</li> </ul>                                                                                                                                                                                                                                                                                                       |                                                                                                                                                                                                                                                                                                                                                                                                                                                                                                                                                                                                                                                                                                                                                                                                                     |

**Zhang C et al. Cohort Profile: Diabetes & Women's Health Study**

| Variable                                                        | Cycle 1 (2012-2014)                                                                                                                                                                                                                                                                                                                  | Cycle 2 (2014-2016)                                                                                                                                                                                                                                                                                                                                                                |
|-----------------------------------------------------------------|--------------------------------------------------------------------------------------------------------------------------------------------------------------------------------------------------------------------------------------------------------------------------------------------------------------------------------------|------------------------------------------------------------------------------------------------------------------------------------------------------------------------------------------------------------------------------------------------------------------------------------------------------------------------------------------------------------------------------------|
|                                                                 | <ul style="list-style-type: none"> <li>• Cancer</li> <li>• Parkinson's</li> <li>• Multiple sclerosis</li> <li>• Heart problems</li> </ul>                                                                                                                                                                                            |                                                                                                                                                                                                                                                                                                                                                                                    |
| <b>Participants' Male Partner's Health at time of pregnancy</b> | <p><b>NHS II and DNBC</b></p> <ul style="list-style-type: none"> <li>• Age</li> <li>• Height</li> <li>• Weight</li> <li>• Body type</li> <li>• Type 1 diabetes</li> <li>• Type 2 diabetes</li> <li>• High blood pressure</li> <li>• Elevated cholesterol</li> <li>• Heart disease</li> <li>• Education</li> <li>• Smoking</li> </ul> | <p><b>NHS II and DNBC</b></p> <ul style="list-style-type: none"> <li>• Type 1 diabetes</li> <li>• Type 2 diabetes</li> <li>• High blood pressure</li> <li>• Elevated cholesterol</li> <li>• Heart disease</li> </ul>                                                                                                                                                               |
| <b>Participants' Child's Health</b>                             | <p><b>NHS II and DNBC</b></p> <ul style="list-style-type: none"> <li>• Age of menarche</li> <li>• Body type</li> <li>• Type 1 diabetes</li> <li>• Type 2 diabetes</li> <li>• High blood pressure</li> <li>• High cholesterol</li> <li>• Asthma</li> <li>• Autism</li> </ul>                                                          | <p><b>NHS II and DNBC</b></p> <ul style="list-style-type: none"> <li>• Height</li> <li>• Weight</li> <li>• Kidney disease</li> <li>• Myopia</li> <li>• PCOS</li> <li>• Type 1 diabetes</li> <li>• Type 2 diabetes</li> <li>• High blood pressure</li> <li>• High cholesterol</li> <li>• Asthma</li> <li>• Schizophrenia</li> <li>• Multiple sclerosis</li> <li>• Autism</li> </ul> |
